# Supplementary material
Source: HighWire-hosted journal article supplement (https://jnnp.bmj.com/content/94/5/379)
Supplement: inline-supplementary-material-1 [file inline-supplementary-material-1.pdf]

**Structural and functional correlates of response to deep brain stimulation at ventral capsule/ventral striatum region for treatment-resistant depression**

Supplementary Information

**Supplementary Methods**

Inclusion Criteria: Subjects aged 18-65 years old who were able to provide informed consent were included. Inclusion criteria included psychiatrist-confirmed International Classification of Diseases, 10th revision (ICD-10) diagnostic criteria for major depressive disorder;  $\geq 17$  on the 17-item Hamilton depression rating scale (HAMD) and medical record documentation that each patient's current major depressive episode persisted for  $\geq 2$  years or  $\geq 4$  recurrences with a current episode lasting  $\geq 1$  year.<sup>1</sup> Treatment resistance was defined as a lack of clinically substantive response to at least 3 or more adequate trials of antidepressant therapy, including 8 or more weeks of 2 or more different classes of antidepressants (eg, selective serotonin reuptake inhibitor, tricyclic antidepressant, tricyclic antidepressant with lithium augmentation, monoamine oxidase inhibitor); at least 1 session of electroconvulsive therapy (ECT), for which the series of ECT was terminated either due to adverse effects or insufficient response (including at least 6 sessions of bilateral ECT), or unable to receive ECT; poor improvement after at least 6 weeks of psychotherapy treatment for the current or a previous depressive episode. Patients who fulfilled the above criteria and remained stable with the current antidepressive regimen for the last month were eligible.

Exclusion criteria were schizophrenia or psychosis unrelated to MDD, severe personality disorder or

neurological disorders (e.g., Parkinson's disease, dementia, epilepsy, tic disorder), organic brain disorders (e.g., tumor, cerebral vascular diseases), history of brain surgery and contraindications for anesthesia or stereotactic surgery. Subjects with contraindications for surgery such as major medical comorbidities or the use of anticoagulating medications that could not be discontinued were also excluded.

**Post-operative programming:** The effectiveness and safety of each electrode contact was assessed by an initial programming session 1 week after the surgery. Trained psychiatrists and neurosurgeons tested each contact individually through careful parameter titration with monopolar stimulation. The amplitude was gradually increased at a 0.5V stepwisely from 2V with fixed frequency (130Hz) and pulse width (90 $\mu$ s). With the stimulator as anode (+), each electrode, beginning with the most distal one, was stimulated as monopolar cathode (-) with an increasing amplitude to a maximum of 6 V for 30-60 s, as long as no acute adverse effects were elicited. If little clinical improvement was achieved following standardized optimization, we tested voltages greater than 6.0 V and adjustments in pulse width and frequency. Induction of beneficial effects or adverse effects were documented. If beneficial effects were noted, the respective electrode was chosen with minimal adverse effect. Chronic stimulation settings were chosen based on the above testing and adjusted every two weeks based on the improvement of depression symptoms.<sup>2</sup>

**Image Acquisition:** Pre-surgical imaging was performed on a 3T MRI system (Ingenia, Philips Medical Systems, the Netherlands). The MRI protocol consisted of the following sequences: axial three-dimensional T1-weighted Turbo-Field-Echo sequence (TR/TE 6.99/3.42 ms, voxel size 0.75x0.75x1.5mm<sup>3</sup>, FOV 240x240 mm<sup>2</sup>), and axial T2-weighted fast spin-echo (T2 TSE; TR/TE 4000/106 ms, voxel size 0.6x0.6x1.5mm<sup>3</sup>, FOV 240x240 mm<sup>2</sup>). Postoperative CT scans were also acquired. High-resolution images were acquired on a

LightSpeed16 (GE Medical System, Milwaukee, WI, USA) slice CT with a spatial resolution of 0.49x0.49x0.67mm<sup>3</sup>. Images were acquired in axial (i.e., sequential/incremental) order at 140 kV and automated mA setting. The noise index was 7.0. A large scan FOV with a 50 cm diameter was used.

DBS Lead Localization: DBS electrodes were localized using Lead-DBS using the PaCER algorithm.<sup>3</sup> In brief, postoperative CT images were first linearly coregistered to preoperative MRI and normalized into ICBM 2009b NLIN asymmetric space using the SyN approach implemented in Advanced Normalization Tools. DBS electrodes were then localized using Lead-DBS and warped into the Montreal Neurological Institute (MNI) space using the PaCER algorithm after visual review and refinement of the coregistrations and normalizations.<sup>4</sup> Anatomical segmentations of local subcortical structures at the DBS site as defined by the CIT-168 atlas.<sup>5</sup>

Electric Fields Estimation: Electric fields (E-fields) were calculated applying a finite element method (FEM)-based model in each patient.<sup>3</sup> Conductivities of 0.33 and 0.14S/m were assigned to gray and white matter, respectively. Based on the volume conductor model, the potential distribution was simulated using the integration of the FieldTrip-SimBio pipeline. The surface of the volume mesh served as the anode. Subsequently, the gradient of the potential distribution was calculated by derivation of the FEM solution.

The anatomical regions defined in AAL-3 used in this study and their abbreviations.

| No. | Anatomical description               | Abbreviation | No. | Anatomical description  | Abbreviation |
|-----|--------------------------------------|--------------|-----|-------------------------|--------------|
| 1   | Precentral gyrus                     | PreCG        | 30  | Fusiform gyrus          | FFG          |
| 2   | Superior frontal gyrus, dorsolateral | SFG          | 31  | Postcentral gyrus       | PoCG         |
| 3   | Middle frontal gyrus                 | MFG          | 32  | Superior parietal gyrus | SPG          |

|    |                                          |            |    |                                                                   |        |
|----|------------------------------------------|------------|----|-------------------------------------------------------------------|--------|
| 4  | Inferior frontal gyrus, opercular part   | IFGoperc   | 33 | Inferior parietal gyrus, excluding supramarginal and angular gyri | IPG    |
| 5  | Inferior frontal gyrus, triangular part  | IFGtriang  | 34 | SupraMarginal gyrus                                               | SMG    |
| 6  | IFG pars orbitalis                       | IFGorb     | 35 | Angular gyrus                                                     | ANG    |
| 7  | Rolandic operculum                       | ROL        | 36 | Precuneus                                                         | PCUN   |
| 8  | Supplementary motor area                 | SMA        | 37 | Paracentral lobule                                                | PCL    |
| 9  | Olfactory cortex                         | OLF        | 38 | Caudate nucleus                                                   | CAU    |
| 10 | Superior frontal gyrus, medial           | SFGmedial  | 39 | Lenticular nucleus, Putamen                                       | PUT    |
| 11 | Superior frontal gyrus, medial orbital   | PFCventmed | 40 | Lenticular nucleus, Pallidum                                      | PAL    |
| 12 | Gyrus rectus                             | REC        | 41 | Thalamus                                                          | THA    |
| 13 | Medial orbital gyrus                     | OFCmed     | 42 | Heschl's gyrus                                                    | HES    |
| 14 | Anterior orbital gyrus                   | OFCant     | 43 | Superior temporal gyrus                                           | STG    |
| 15 | Posterior orbital gyrus                  | OFCpost    | 44 | Temporal pole: superior temporal gyrus                            | TPOsup |
| 16 | Lateral orbital gyrus                    | OFClat     | 45 | Middle temporal gyrus                                             | MTG    |
| 17 | Insula                                   | INS        | 46 | Temporal pole: middle temporal gyrus                              | TPOmid |
| 18 | Anterior cingulate & paracingulate gyri  | ACC        | 47 | Inferior temporal gyrus                                           | ITG    |
| 19 | Middle cingulate & paracingulate gyri    | MCC        | 48 | Anterior cingulate cortex, subgenual                              | ACCsub |
| 20 | Posterior cingulate gyrus                | PCC        | 49 | Anterior cingulate cortex, pregenual                              | ACCpre |
| 21 | Hippocampus                              | HIP        | 50 | Anterior cingulate cortex, supracallosal                          | ACCsup |
| 22 | Parahippocampal gyrus                    | PHG        | 51 | Nucleus accumbens                                                 | Nacc   |
| 23 | Amygdala                                 | AMYG       | 52 | Ventral tegmental area                                            | VTA    |
| 24 | Calcarine fissure and surrounding cortex | CAL        | 53 | Substantia nigra, pars compacta                                   | SNpc   |

|    |                          |      |    |                                      |                 |
|----|--------------------------|------|----|--------------------------------------|-----------------|
| 25 | Cuneus                   | CUN  | 54 | Substantia nigra, pars<br>reticulata | SNpr            |
| 26 | Lingual gyrus            | LING | 55 | Locus coeruleus                      | Red nucleus     |
| 27 | Superior occipital gyrus | SOG  | 56 | Red nucleus                          | Locus coeruleus |
| 28 | Middle occipital gyrus   | MOG  | 57 | Raphe nucleus, dorsal                | RapheD          |
| 29 | Inferior occipital gyrus | IOG  | 58 | Raphe nucleus,<br>median             | RapheM          |

Functional Connectivity Estimation: Voxel-wised functional connectivity seeding from bilateral E-fields were estimated using a normative resting state functional connectivity dataset retrieved from the Brain Genomics Superstruct Project (GSP), which included 1570 subjects in total (ages 18-36), and 1000 subjects (1:1 M/F), were chosen and processed using publicly available tools to generate a normative functional connectivity dataset.<sup>6</sup> The original GSP data was acquired on matched Siemens 3T MAGNETOM Tim Trio MRI systems (Erlangen, Germany) using the vendor-supplied 12-channel phased-array head coil. Preprocessing included global signal regression and spatial smoothing at 6mm full width at half maximum as described.<sup>6</sup> Seeding from voxels within the E-field model, a voxel-wised functional connectivity profile was calculated. Values in E-fields served as weights to generate the connectivity profile using the Lead-DBS tool.<sup>3</sup>

Structural Connectivity Estimation and Fiber Tracking: The structural connectivity estimation and fiber tracking were implemented using Lead-DBS.<sup>3</sup> Briefly, voxel-wised structural connectivity profiles seeding from bilateral E-fields were estimated using a normative group connectome computed based on multishell diffusion-weighted imaging data from 32 subjects of the Human Connectome Project at Massachusetts General Hospital.<sup>7</sup> Whole brain tractography fiber sets were calculated using a generalized q-sampling imaging algorithm. In each subject, 200,000 fibers were sampled and then transformed into MNI space.<sup>7</sup> For each patient, fibers passing through a non-zero voxel of the E-field were selected from this normative connectome

and projected onto a voxelized volume in standard space (2mm resolution) while keeping count of the fibers traversing each voxel. Each fiber received the weight of the maximal E-field magnitude of its passage and fiber densities were weighted by these values.

Leave-one-out cross-validation: The value of the above connectivity profiles as well as the identified fibertracts in outcome prediction was tested by employing leave-one-out cross-validation to predict out-of-sample outcome data.<sup>7</sup> Firstly, connectivity data seeding from E-field from the #2-71 settings were used to create the combined optimal map, and this map was used to estimate the outcome in setting #1; then connectivity data from the #1, 3-71 settings were used to estimate the outcome in patient #2, and so on. The spatial correlation between the individual patient map and the optimal map, which was expressed as a Spearman's rank correlation coefficient, describes the similarity between a patient's brain connectivity profile and the optimal connectivity profile.<sup>7</sup>

Creation of agreement mask across functional and structural imaging modalities: The R-maps of the two modalities (functional and structural) were superimposed and masked with functional weighted average map to generate the following agreement masks:

- 1) 'good correlation': areas that were positive in three maps (weighted average map<sub>func</sub>>0  $\cap$  R-map<sub>func</sub>>0  $\cap$  R-map<sub>struc</sub>>0; voxels showed functional correlation with E-field and positively correlated with outcome in both functional and structural connectivity);
- 2) 'good anti-correlation': areas that were positive in structural R-map, but negative in functional weighted average map and R-map (weighted average map<sub>func</sub><0  $\cap$  R-map<sub>func</sub><0  $\cap$  R-map<sub>struc</sub>>0; voxels showed

functional anti-correlation with E-field but positively correlated with outcome in structural connectivity and negatively correlated with outcome in functional connectivity);

3) 'bad correlation': areas that were positive in functional weighted average map, but negative in functional and structural R-map (weighted average  $\text{map}_{\text{func}} > 0 \cap \text{R-map}_{\text{func}} < 0 \cap \text{R-map}_{\text{struc}} < 0$ ; voxels showed functional correlation with E-field but negatively correlated with outcome in both structural and functional connectivity);

4) 'bad anti-correlation': areas that were positive in functional R-map, but negative in functional weighted average map and structural R-map (weighted average  $\text{map}_{\text{func}} < 0 \cap \text{R-map}_{\text{func}} > 0 \cap \text{R-map}_{\text{struc}} < 0$ ; voxels showed functional anti-correlation with E-field but positively correlated with outcome in functional connectivity and negatively correlated with outcome in structural connectivity).

Compared with previous agreement map,<sup>8</sup> the above 4 subtypes of agreement mask were constructed without assigning connectivity strength and only informed the area but not connectivity strength, because though the presence of a functional connection may depend on the presence of a direct or indirect structural connection, the strength of a functional connection does not need to be directly related to the strength of those structural connections.<sup>9</sup> The agreement masks were combined to mask the functional or structural R-map for outcome prediction.

Automated anatomical labelling atlas 3 (AAL-3) was used for brain parcellation.<sup>10</sup> In addition, functionally defined orbitofrontal and prefrontal regions implicated in TRD including orbitofrontal cortex (OFC), dorsolateral PFC (dlPFC), ventrolateral PFC (vlPFC), and ventromedial (vmPFC) were manually defined and used in previous publications from our group (supplemental materials in Morris et al on manual definitions).<sup>11</sup> We hypothesized that regions retained in the agreement mask could be more specific for clinical outcomes in both modalities.

**Supplementary Results**

A

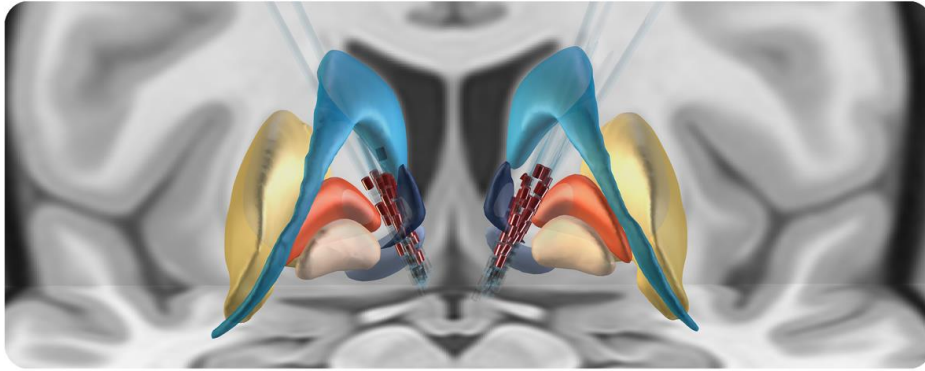

B

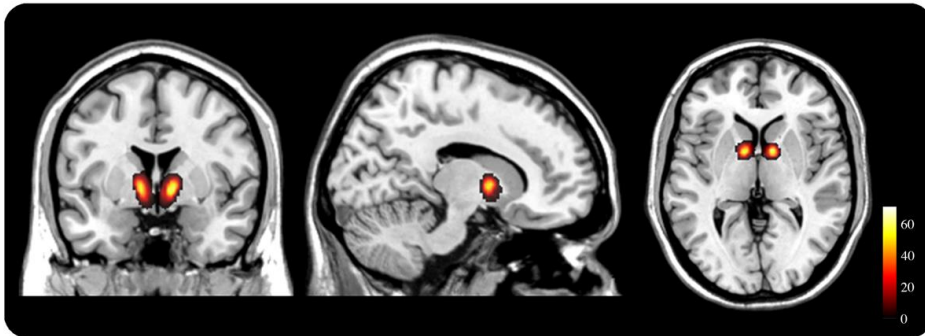

Supplementary figure 1. Location of electrodes the E-fields. A, the current cohort targeting VC/VS, subcortical structures defined by CIT-168 Atlas, with coronal and axial planes of the T1-weighted MNI152 NLIN 2009b template as background. Electrodes were made semi-transparent and active contacts are marked in red, light blue pseudocolor indicates the location of the caudate, yellow for the putamen, orange for the globus pallidus externus, light brown for the globus pallidus internus, dark blue for extensive amygdala, purple for nucleus accumbens. B, location of e-fields in coronal, sagittal and axial T1-weighted MRI (MNI152 NLIN 2009b) slices, the hot map denoted the number of binarized E-fields (thresholded at 0.2V/mm for visualization) overlapped in each voxel.



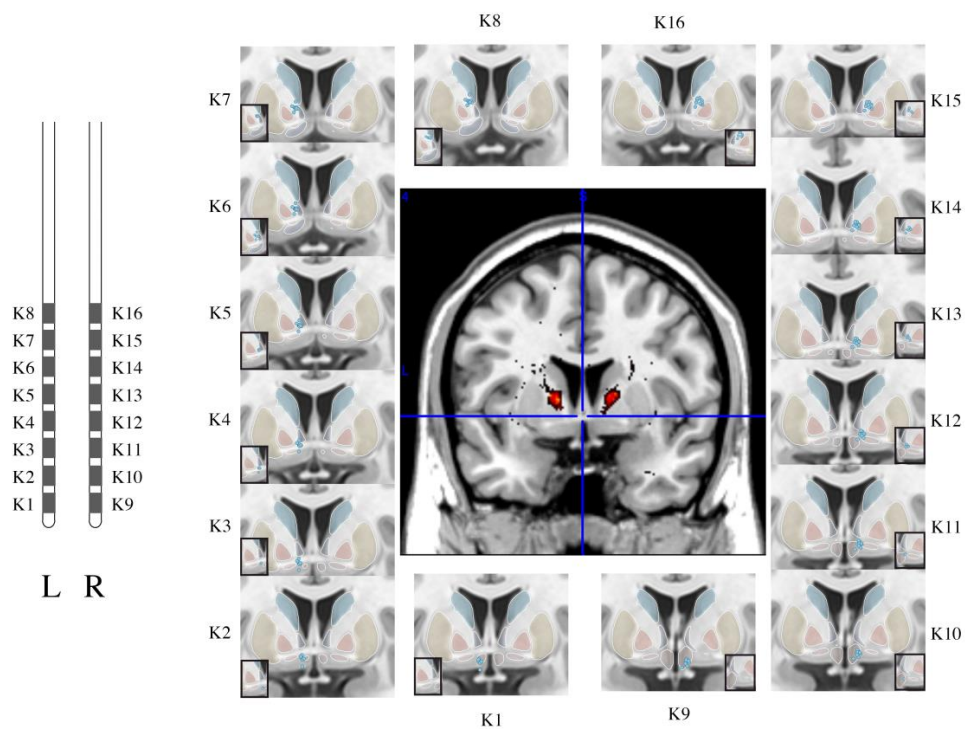

Supplementary figure 2. Contact visualization and fibertracts discriminative of HAMD-17 improvement when modulated. Red tracts in the middle image are positively correlated with clinical improvement. Contacts were shown in blue circles. Active contacts were show in black boxes at the corner of each contact image.

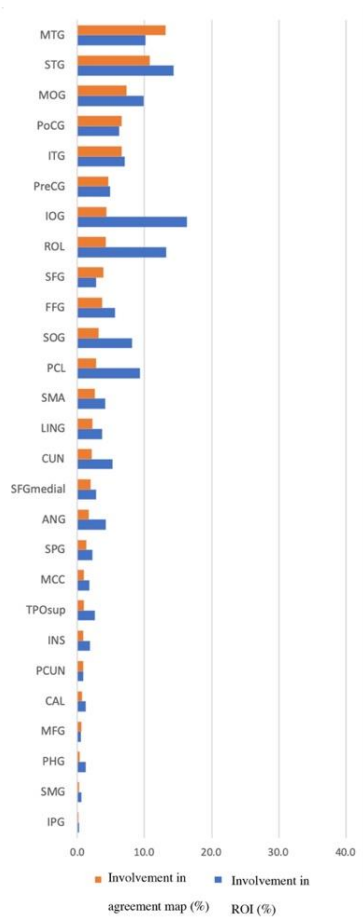

Supplementary figure 3. Percentage involvement in 'good anti-correlation' agreement mask by ROI in AAL-3

brain parcellation. ROIs were analyzed bilaterally.

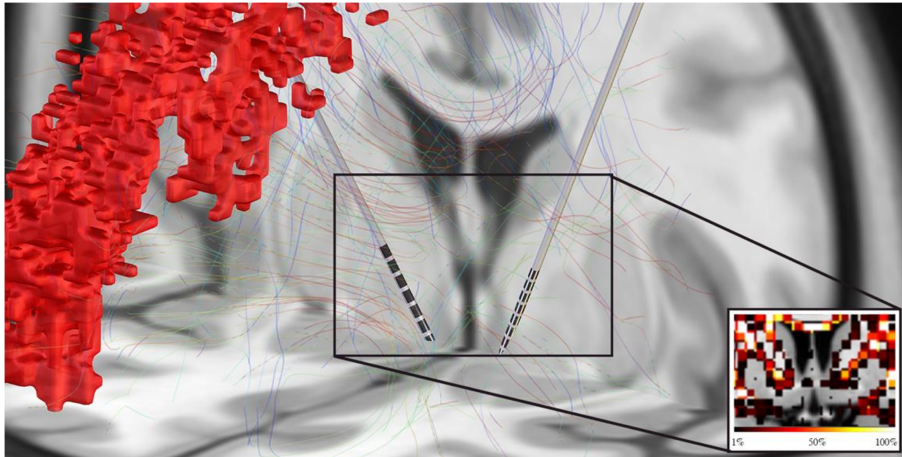

Supplementary figure 4. The whole-brain tractography of the cross-modality map beneficial for outcome in Lead-DBS software. A sample of electrode was displayed. The percent of fibers connected to the voxels relative to the max was denoted by heatmap in the black box.

## Reference

1. Hamilton M. A rating scale for depression. *Journal of neurology, neurosurgery, and psychiatry* 1960;23(1):56-62. doi: 10.1136/jnnp.23.1.56.
2. Bergfeld IO, Mantione M, Hoogendoorn ML, et al. Deep Brain Stimulation of the Ventral Anterior Limb of the Internal Capsule for Treatment-Resistant Depression: A Randomized Clinical Trial. *JAMA psychiatry* 2016;73(5):456-64. doi: 10.1001/jamapsychiatry.2016.0152.
3. Horn A, Li N, Dembek TA, et al. Lead-DBS v2: Towards a comprehensive pipeline for deep brain stimulation imaging. *NeuroImage* 2019;184:293-316. doi: 10.1016/j.neuroimage.2018.08.068.
4. Husch A, M VP, Gemmar P, et al. PaCER - A fully automated method for electrode trajectory and contact reconstruction in deep brain stimulation. *NeuroImage Clinical* 2018;17:80-89. doi: 10.1016/j.nicl.2017.10.004.
5. Pauli WM, Nili AN, Tyszka JM. A high-resolution probabilistic in vivo atlas of human subcortical brain nuclei. *Scientific data* 2018;5:180063. doi: 10.1038/sdata.2018.63.
6. Cohen A, Soussand L, McManus P, et al. GSP1000 Preprocessed Connectome. V3 ed: Harvard Dataverse, 2020.
7. Horn A, Reich M, Vorwerk J, et al. Connectivity Predicts deep brain stimulation outcome in Parkinson disease. *Annals of neurology* 2017;82(1):67-78. doi: 10.1002/ana.24974.
8. Sobesky L, Goede L, Odekerken VJJ, et al. Subthalamic and pallidal deep brain stimulation: are we modulating the same network? *Brain : a journal of neurology* 2021 doi: 10.1093/brain/awab258.
9. Straathof M, Sinke MR, Dijkhuizen RM, et al. A systematic review on the quantitative relationship between structural and functional network connectivity strength in mammalian brains. *Journal of Cerebral Blood Flow & Metabolism* 2019;39(2):189-209. doi: 10.1177/0271678x18809547.
10. Rolls ET, Huang CC, Lin CP, et al. Automated anatomical labelling atlas 3. *NeuroImage* 2020;206:116189. doi: 10.1016/j.neuroimage.2019.116189.
11. Morris LS, Kundu P, Dowell N, et al. Fronto-striatal organization: Defining functional and microstructural substrates of behavioural flexibility. *Cortex* 2016;74:118-33. doi: 10.1016/j.cortex.2015.11.004.
